# Supplementary material for: Synthesis of New Derivatives of BEDT-TTF: Installation of Alkyl, Ethynyl, and Metal-Binding Side Chains and Formation of Tris(BEDT-TTF) Systems
Source: MDPI journal article supplement (doi:10.3390/magnetochemistry7080110), 2021-08-03
Supplement: s1 [file s1]

Archive with 1 entries (1 files):
- magnetochemistry-1263594-supplementary.pdf
